# Supplementary material
Source: PubMed Central journal article supplement (PMC4238801)
Supplement: bi501078j_si_001.pdf [file bi501078j_si_001.pdf]

## Supporting Information for:

### Mutations in the Proteolipid Subunits of the Vacuolar H<sup>+</sup>-ATPase Provide Resistance to Indolotryptoline Natural Products.

Fang-Yuan Chang,<sup>†</sup> Shigehiro A. Kawashima,<sup>‡</sup> and Sean F. Brady\*<sup>†</sup>

<sup>†</sup>Laboratory of Genetically Encoded Small Molecules, The Rockefeller University, Howard Hughes Medical Institute, 1230 York Avenue, New York, NY 10065, United States

<sup>‡</sup>Graduate School of Pharmaceutical Science, The University of Tokyo, Bunkyo-ku, Tokyo, Japan

#### Supporting Information Table of Contents

|                                                                      |    |
|----------------------------------------------------------------------|----|
| <b>Figure S1.</b> Whole-cell cytotoxicity dose response curves ..... | S2 |
| <b>Figure S2.</b> Targeted mutants .....                             | S3 |
| <b>Figure S3.</b> Fluorescent images .....                           | S4 |
| <b>Figure S4.</b> Protein sequence alignment .....                   | S5 |
| <b>Table S1.</b> <i>Schizosaccharomyces pombe</i> strain list .....  | S6 |
| <b>Table S2.</b> PCR primer list .....                               | S7 |
| <b>Table S3.</b> Summary of IC <sub>50</sub> /MIC values.....        | S8 |

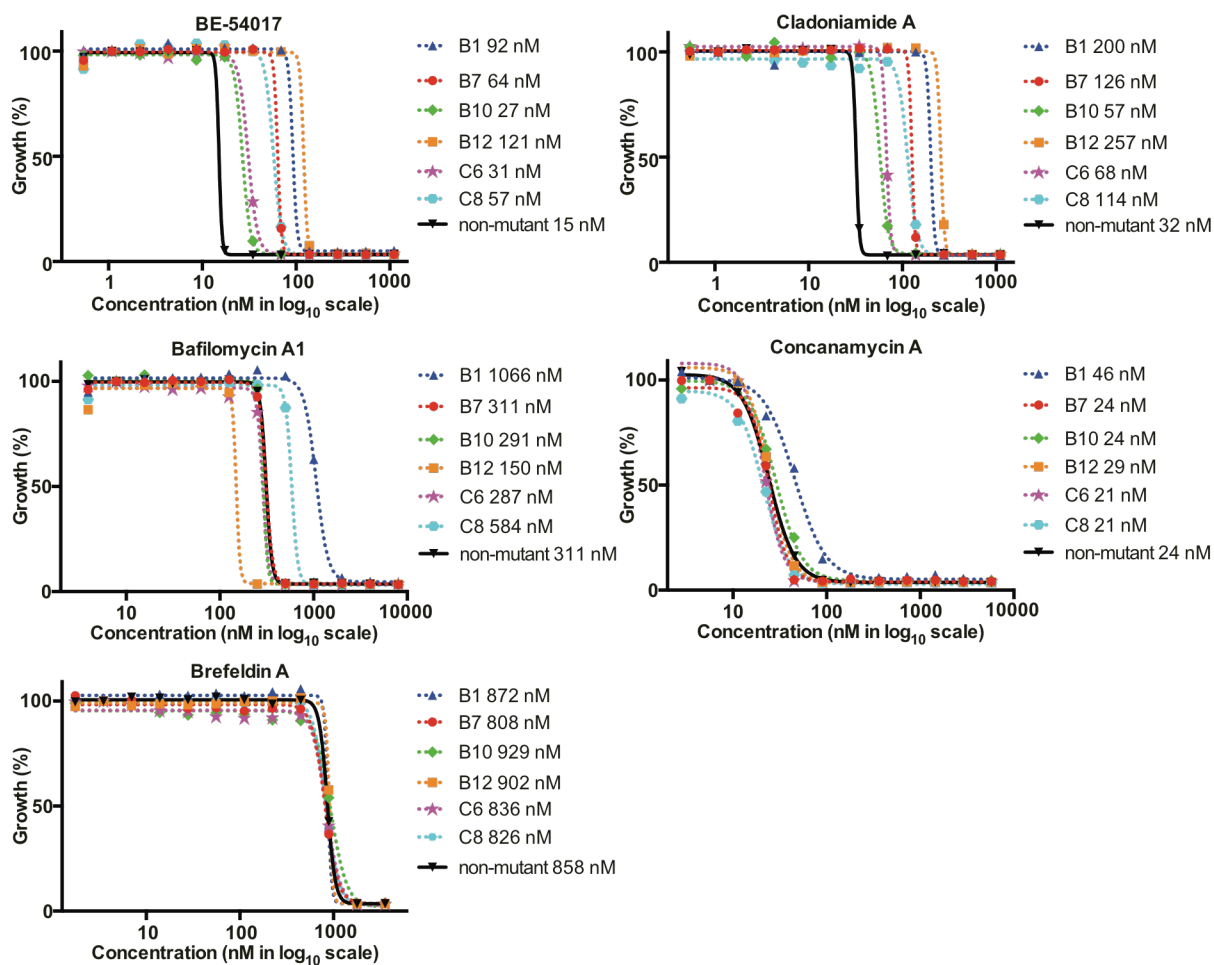

**Figure S1.** Whole-cell cytotoxicity dose response curves of compounds tested in this study in resistant mutant and un-mutagenized MDR-sup *S. pombe* strains. The  $IC_{50}$  values determined from these dose response curves are noted on the legend of each graph. See also Table S3.

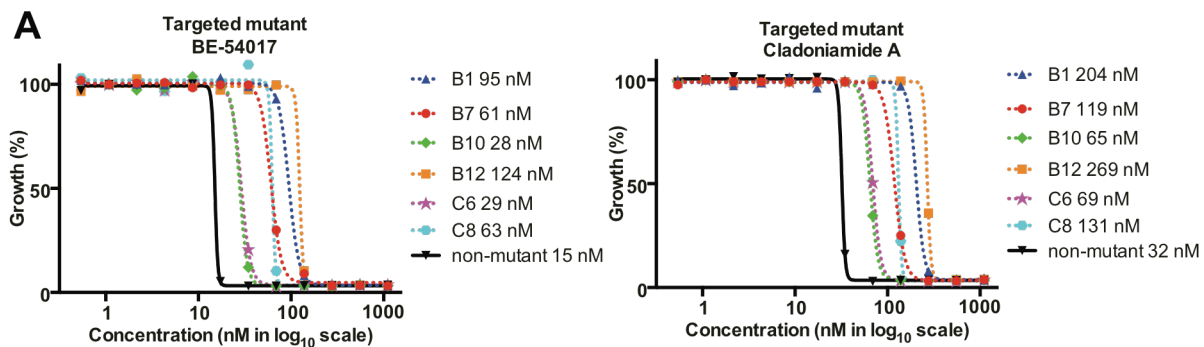

**B**

| Mutant ID                                                       |            | B1   | B7   | B10  | B12  | C6   | C8   |
|-----------------------------------------------------------------|------------|------|------|------|------|------|------|
| Fold difference in IC <sub>50</sub><br>(relative to non-mutant) | <b>BE</b>  | x6.3 | x4.1 | x1.9 | x8.3 | x1.9 | x4.2 |
|                                                                 | <b>Cla</b> | x6.4 | x3.7 | x2.0 | x8.4 | x2.2 | x4.1 |

**Figure S2.** Targeted mutants. **A)** Dose response curves of indolotryptoline compounds tested in target mutagenized and un-mutagenized MDR-sup *S. pombe* strains. The IC<sub>50</sub> values determined from these dose response curves are noted on the legend of each graph. **B)** Fold difference in IC<sub>50</sub> of the targeted mutants relative to the un-mutagenized control. Abbreviations: BE, BE-54017; Cla, cladoniamide A. See also Table S3.

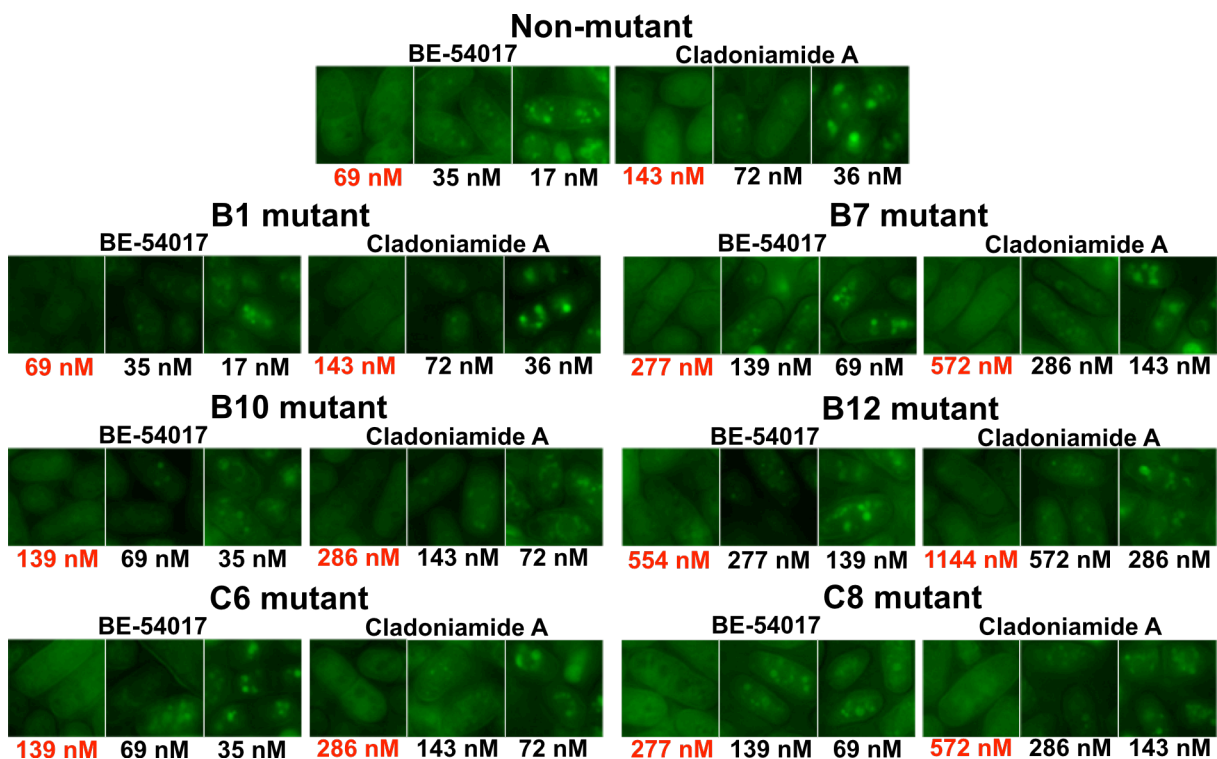

**Figure S3.** Fluorescent images of quinacrine-stained resistant mutants or un-mutagenized MDR-sup *S. pombe* upon incubation with either BE-54017 or cladoniamide A. The minimal inhibitory concentration (MIC) for *in vivo* V-ATPase activity was defined as the minimal concentration of compound at which no fluorescent puncta was observed in >95% of the cells and indicated for each assay as red text. See also Table S3.

|                       |     |                                    |                              |              |               |          |
|-----------------------|-----|------------------------------------|------------------------------|--------------|---------------|----------|
|                       |     |                                    | <b>H1</b>                    |              | <b>H2</b>     |          |
| <i>S. pombe</i> Vma3  | 1   | MST-DLCPVYAPFFGVMGCTAAIVFASFGAAYG  | TAKAGVGISAM                  | GVL          | RPDLIVKNTIPVV | 59       |
| <i>S. pombe</i> Vma11 | 1   | MSS-NLCPIYSSFFGFAGVCASMVFSCLGAGYG  | TALAGRGIAAV                  | GAF          | RPEIVMKS      | LIPVV 59 |
| <i>N. crassa</i> Vma3 | 1   | MS--DLCPVYAPFFGAMGCTAAIVFTCLGASYG  | TAKSGVGIAAM                  | GVL          | RPDLIVKNIVPVI | 58       |
| <i>E. hirae</i> NtpK  | 1   | MMDYLITQNGGMVFAVLAMATATIFSGIGSAKGV | GMTGEAAAAAL                  | TTS          | OPEKFGQALILQL | 60       |
|                       |     |                                    | <b>H2</b>                    |              | <b>H3</b>     |          |
| <i>S. pombe</i> Vma3  | 60  | MAGIIAIYGLVVSVLISGNLKQ--ILSLYSGFI  | QLGAGLSVGLAGLAAGFAIGIVGDAGV  |              |               | 117      |
| <i>S. pombe</i> Vma11 | 60  | MSCIIGVYGLVMSVLIAGDMSPDNDYSLFSGFI  | HL SAGLAVGLTGVAAGYAIGVVGDRGV |              |               | 119      |
| <i>N. crassa</i> Vma3 | 59  | MAGIIGIYGLVVSVLISDALTDQ--HYALYTGFI | QLGAGLAVGLAGLAAGFAIGIVGDAGV  |              |               | 117      |
| <i>E. hirae</i> NtpK  | 61  | LPCTQGLYGFVIAFLIFINLGS--DMSVVQGLN  | FLGASLP                      | IAFTGLFSGIAQ | GKVAAGI       | 118      |
|                       |     |                                    | <b>H3</b>                    |              | <b>H4</b>     |          |
| <i>S. pombe</i> Vma3  | 118 | RGTAQQPRLFVAMILILIFAEVLGLYGLIVALLN | TRATDNVTC                    |              |               | 161      |
| <i>S. pombe</i> Vma11 | 120 | QSFMRQDRIFVSMVLILIFAEVLGLYGLIVGLIL | QTKTS-NVCY                   |              |               | 162      |
| <i>N. crassa</i> Vma3 | 118 | RGTAQQPRLFVGMILILIFAEVLGLYGLIVALLM | NSKATLNTSC                   |              |               | 161      |
| <i>E. hirae</i> NtpK  | 119 | QILAKKPEHATKGIIFAAVETYAILGFVISFLLV | LNA-----                     |              |               | 156      |

**Figure S4.** Protein sequence alignment of *Schizosaccharomyces pombe*, *Neurospora crassa* (used for plecomacrolide resistance), and *Enterococcus hirae* (used for crystal structure) proteolipid subunits. Regions that constitute the four helix bundle are highlighted (H1 brown, H2 yellow, H3 green, H4 orange). Residues that confer resistance to indolotryptolines in this study (red) and plecomacrolides from a previous study (blue) are colored.

**Table S1.** *Schizosaccharomyces pombe* strain list

| Name   | Genotype                                                                                |
|--------|-----------------------------------------------------------------------------------------|
| SAK1   | h+; <i>ade6-M210 leu1 ura4-D18</i>                                                      |
| SAK84  | h+; <i>ade6 leu1 pap1::kanr bfr1::hygr pmd1::natr caf5::kanr mfs1::natr erg5* dnf2*</i> |
| SAK690 | h-; <i>ade6 leu1 pap1::kanr bfr1::hygr pmd1::natr caf5::kanr mfs1::natr erg5* dnf2*</i> |

\* indicates frameshift mutation

**Table S2.** PCR primer list.

| Name                     | Sequence               |
|--------------------------|------------------------|
| seq <sup>a</sup> -vma3-F | CGACATTGTAAAAGCCAGCT   |
| seq-vma3-R               | TCCCACCATAGAGATTCTC    |
| seq-vma11-F              | CAACGAAATACTACATCGACA  |
| seq-vma11-R              | TGATTAGCCTTAGAGAAAGTC  |
| seq-zhf1-F               | ATATAGCAAGTTTGCGCCTC   |
| seq-zhf1-R               | GTGACACAATAGATTAACCACG |
| mut <sup>b</sup> -vma3-F | CGATACGACATTGTAAAAGCC  |
| mut-vma3-R               | CGTGAAGTACATGCTTATACG  |
| mut-vma11-F              | AGAACTTGTGCCAAAAGTCC   |
| mut-vma11-R              | GCCTTAGAGAAAGTCAACAAG  |
| mut-zhf1-F               | TTGTGGTAAACGCGATTAGTG  |
| mut-zhf1-R               | CTAACGAGAAGAATCAAACC   |

(a) seq = primer used for gene sequencing. (b) mut = primer used for creating homologous recombination cassettes.

**Table S3.** Summary of IC<sub>50</sub>/MIC values.**A)** IC<sub>50</sub> (in nM) of randomly mutagenized resistant mutant strains (as in Figure 3 and S1).

| <b>Mutant ID</b>   | <b>BE-54017</b> | <b>Cladoniamide A</b> | <b>Bafilomycin A1</b> | <b>Concanamycin A</b> | <b>Brefeldin A</b> |
|--------------------|-----------------|-----------------------|-----------------------|-----------------------|--------------------|
| B1                 | 92              | 200                   | 1066                  | 46                    | 872                |
| B3                 | 87              | 179                   | N/D                   | N/D                   | N/D                |
| B5                 | 94              | 199                   | N/D                   | N/D                   | N/D                |
| B7                 | 64              | 126                   | 311                   | 24                    | 808                |
| B10, C12           | 27              | 57                    | 291                   | 24                    | 929                |
| B11                | 29              | 65                    | N/D                   | N/D                   | N/D                |
| B12                | 121             | 257                   | 150                   | 29                    | 902                |
| C3                 | 91              | 191                   | N/D                   | N/D                   | N/D                |
| C6                 | 31              | 68                    | 287                   | 21                    | 836                |
| C8                 | 57              | 114                   | 584                   | 21                    | 826                |
| non-mutant         | 15              | 32                    | 311                   | 24                    | 858                |
| 8 remaining clones | 93*             | 194*                  | N/D                   | N/D                   | N/D                |

N/D = not determined; number in asterisk (\*) represents the average value.

**B)** IC<sub>50</sub> (in nM) of targeted mutants (as in Figure S2).

| <b>Mutant ID</b> | <b>BE-54017</b> | <b>Cladoniamide A</b> |
|------------------|-----------------|-----------------------|
| B1               | 95              | 204                   |
| B7               | 61              | 119                   |
| B10              | 28              | 65                    |
| B12              | 124             | 269                   |
| C6               | 29              | 69                    |
| C8               | 63              | 131                   |

**C)** MIC (in nM) of whole-cell V-ATPase activity (as in Figure 4 and S3).

| <b>Mutant ID</b> | <b>BE-54017</b> | <b>Cladoniamide A</b> |
|------------------|-----------------|-----------------------|
| B1               | 69              | 143                   |
| B7               | 277             | 572                   |
| B10              | 139             | 286                   |
| B12              | 554             | 1144                  |
| C6               | 139             | 286                   |
| C8               | 277             | 572                   |
| non-mutant       | 69              | 143                   |

**D)** IC<sub>50</sub> (in nM) of unmutagenized strain in the presence of zinc (as in Figure 5).

| <b>[ZnCl<sub>2</sub>]</b> | <b>BE-54017</b> | <b>Cladoniamide A</b> | <b>Bafilomycin A1</b> | <b>Concanamycin A</b> | <b>Brefeldin A</b> |
|---------------------------|-----------------|-----------------------|-----------------------|-----------------------|--------------------|
| 0.01 mM                   | 13              | 30                    | 300                   | 26                    | 877                |
| 0.05 mM                   | 7.5             | 19                    | 191                   | 19                    | 830                |
| 0.1 mM                    | 4.5             | 11                    | 150                   | 15                    | 857                |
| 0.2 mM                    | 3.3             | 7.6                   | 76                    | 11                    | 802                |
